# Supplementary material for: Influence of the Sputtering Temperature on Reflectivity and Electrical Properties of ITO/AgIn/ITO Composite Films for High-Reflectivity Anodes
Source: MDPI journal article supplement (doi:10.3390/ma16072849), 2023-04-03
Supplement: s1 [file s1]

---

# **Influence of the Sputtering Temperature on Reflectivity and Electrical Properties of ITO/AgIn/ITO Composite Films for High-Reflectivity Anodes**

Xianqi Wang <sup>1</sup>, Hongda Zhao <sup>2</sup>, Bo Yang <sup>1,\*</sup>, Song Li <sup>1,\*</sup>, Zongbin Li <sup>1</sup>, Haile Yan <sup>1</sup>, Yudong Zhang<sup>3</sup>, Claude Esling<sup>3</sup>,  
Xiang Zhao <sup>1</sup> and Liang Zuo <sup>1</sup>

<sup>1</sup> Key Laboratory for Anisotropy and Texture of Materials, School of Material Science and Engineering, Northeastern University, Shenyang 110819, China

<sup>2</sup> Shenyang Dong Chuang Precious Metals Material Co., Ltd. Shenyang 110000, China

<sup>3</sup> Laboratoire d'Étude des Microstructures et de Mécanique des Matériaux, (LEM3), CNRS, UMR 7239, University of Lorraine, 57045 Metz, France

\*Corresponding author: yangb@atm.neu.edu.cn (B.Y.); lis@atm.neu.edu.cn (S. L.)

## Supplementary S1. Influence of sputtering temperature on the structure and properties of AgIn/Glass

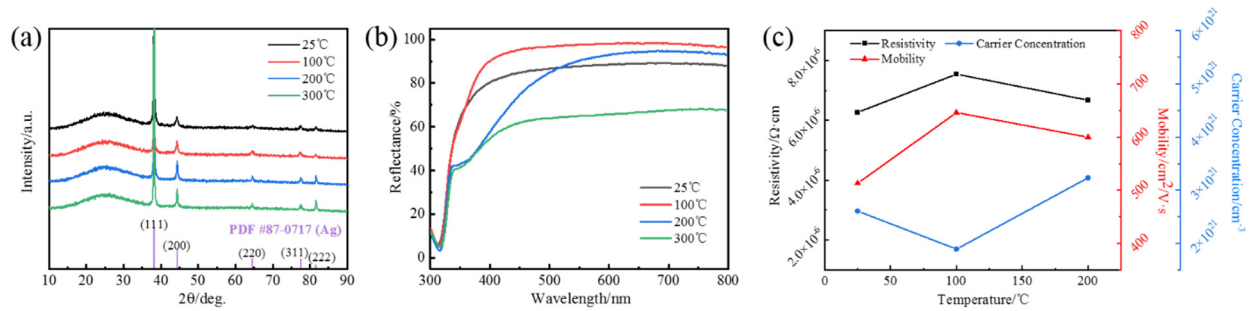

**Figure S1.** (a) XRD pattern of the AgIn/Glass films as a function of sputtering temperature. (b) Reflectance spectra of the AgIn/Glass films as a function of sputtering temperature. (c) Hall measurement of the AgIn/Glass films as a function of sputtering temperature.

## Supplementary S2. Influence of sputtering temperature on the structure and properties of ITO/Glass

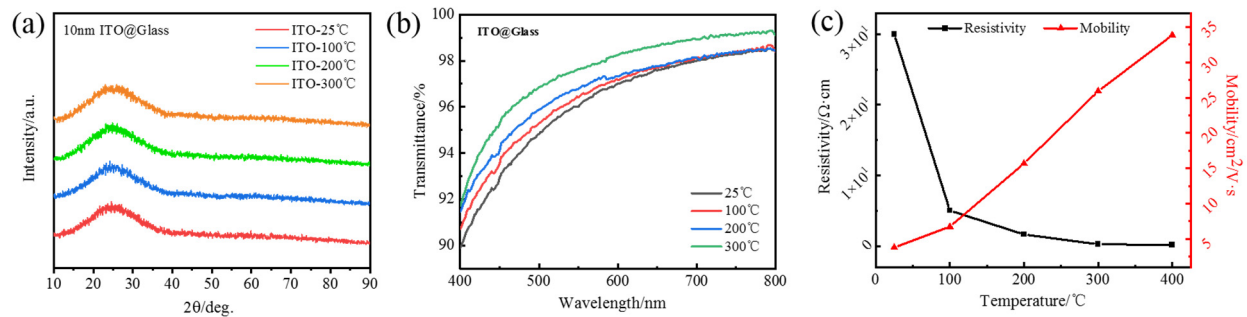

**Figure S2.** (a) XRD pattern of the ITO/Glass films as a function of sputtering temperature. (b) Transmittance spectra of the ITO/Glass films as a function of sputtering temperature. (c) Hall measurement of the ITO/Glass films as a function of sputtering temperature.

**Supplementary S3.** Comparison of SEM images of ITO/AgIn/ITO films and AgIn films at different sputtering temperatures.

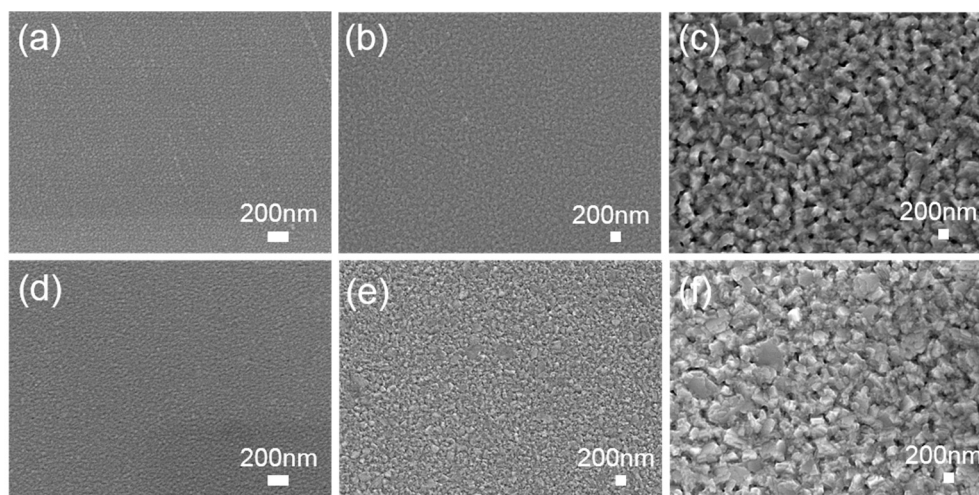

**Figure S3.** Comparison of SEM images of ITO/AgIn/ITO films and AgIn films at different sputtering temperatures. ITO/AgIn/ITO films: (a) 25°C, (b) 100°C and (c) 200°C; AgIn films: (d) 25°C, (e) 100°C and (f) 200°C.
